# Supplementary material
Source: MDPI journal article supplement (https://www.mdpi.com/2071-1050/9/5/832)
Supplement: s1 [file s1]

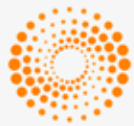

# EDITORIAL CERTIFICATE

This document certifies that the manuscript listed below was edited for proper English language, grammar, punctuation, spelling, and overall style by one or more of the highly qualified native English speaking editors at Scholarly Editing Assistant, a service of Thomson Reuters and AJE.

## Manuscript title:

A spatially explicit optimization model for the location of agricultural straw-based power plants: A case study in Hubei Province, China

## Authors:

ZHAO XIANG, MA XIAOYA, XIAO ZHANCHUN, WANG KUN, LONG YUQING, ZHANG DONGJIE

## Date Issued:

May 3, 2017

## Certificate Verification Key:

F757-1F73-AB6C-D690-D2FF

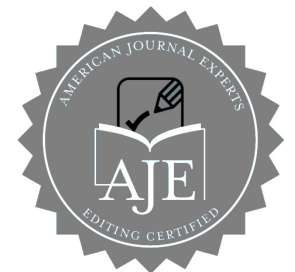

This certificate may be verified at [tr.aje.com/certificate](http://tr.aje.com/certificate). This document certifies that the manuscript listed above was edited for proper English language, grammar, punctuation, spelling, and overall style by one or more of the highly qualified native English speaking editors at Scholarly Editing Assistant. Neither the research content nor the authors' intentions were altered in any way during the editing process. Documents receiving this certification should be English-ready for publication; however, the author has the ability to accept or reject our suggestions and changes. To verify the final Scholarly Editing Assistant edited version, please visit our [verification page](#).
